# Supplementary material for: Controlling armchair and zigzag edges in oxidative cutting of graphene
Source: Royal Society of Chemistry journal article supplement (doi:10.1039/c6tc01947a), 2016-01-01
Supplement: c6tc01947a1.pdf [file c6tc01947a1.pdf]

**Electronic Supplementary Information to**

**Controlling armchair and zigzag edges in oxidative cutting**

**of graphene**

Mahasin Alam Sk,<sup>a,b</sup> Lin Hunag,<sup>a</sup> Peng Chen,<sup>a</sup> Kok Hwa Lim<sup>b</sup>

*<sup>a</sup>Division of Bioengineering, School of Chemical and Biomedical Engineering,  
Nanyang Technological University, 70 Nanyang Drive, 637457, Singapore*

*<sup>b</sup>Singapore Institute of Technology, 10 Dover Drive, 138683, Singapore*

## Binding energy calculations

Binding energy of first and nth O atom adsorption is calculated according to equations 1 and 2, respectively. The average binding energy of O atoms with pure graphene is calculated according to equation 3. The average binding energy of O atoms on strained graphene is also calculated according to equation 3; the only difference is that the total energy of pure graphene ( $E_{\text{graphene}}$ ) and graphene-oxygen complexes ( $E_{\text{graphene} + (n) \text{ oxygen}}$ ) is calculated including strains (-5% to +5% with a increment of 1).

$$E_{\text{BE}}(1^{\text{st}}) = E_{\text{graphene+oxygen}} - E_{\text{graphene}} - E_{\text{oxygen}} \quad (1)$$

$$E_{\text{BE}}(n^{\text{st}}) = E_{\text{graphene} + (n) \text{ oxygen}} - E_{\text{graphene} + (n-1) \text{ oxygen}} - E_{\text{oxygen}} \quad (2)$$

$$E_{\text{BE}}(\text{average}) = [E_{\text{graphene} + (n) \text{ oxygen}} - E_{\text{graphene}} - n * E_{\text{oxygen}}]/n \quad (3)$$

Where,  $E_{\text{BE}}$  is the binding energy,  $E_{\text{graphene} + (n) \text{ oxygen}}$  is the total energy of graphene adsorbed with n O atoms,  $E_{\text{graphene}}$  is the total energy of graphene,  $E_{\text{oxygen}}$  is the total energy of O atom.

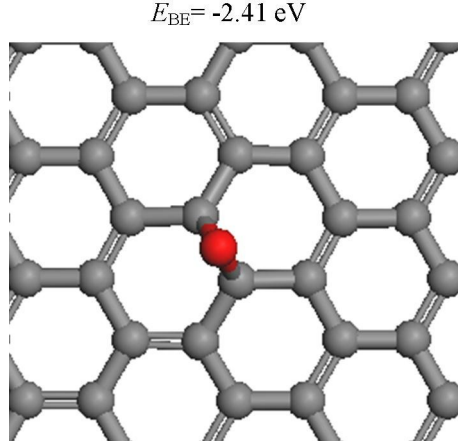

**Fig. S1.** Structure and binding energy ( $E_{BE}$ ) of of oxidized graphene with one epoxy group.

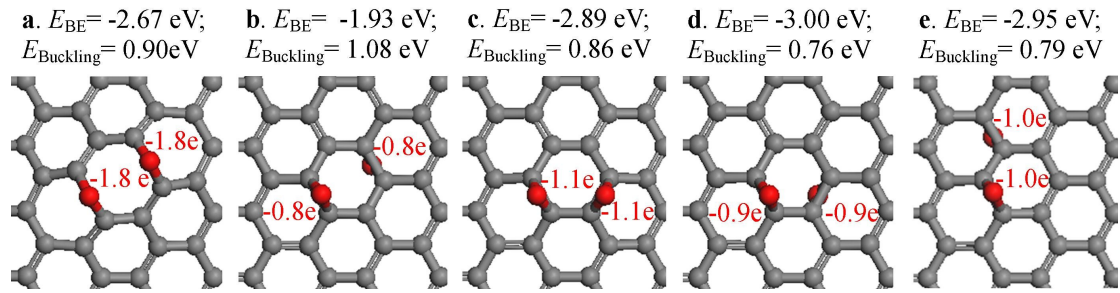

**Fig. S2.** Structure, binding energies ( $E_{BE}$ ) and buckling energies ( $E_{Buckling}$ ) of oxidized graphene with two epoxy groups. The red color text indicates the charge on O atom.

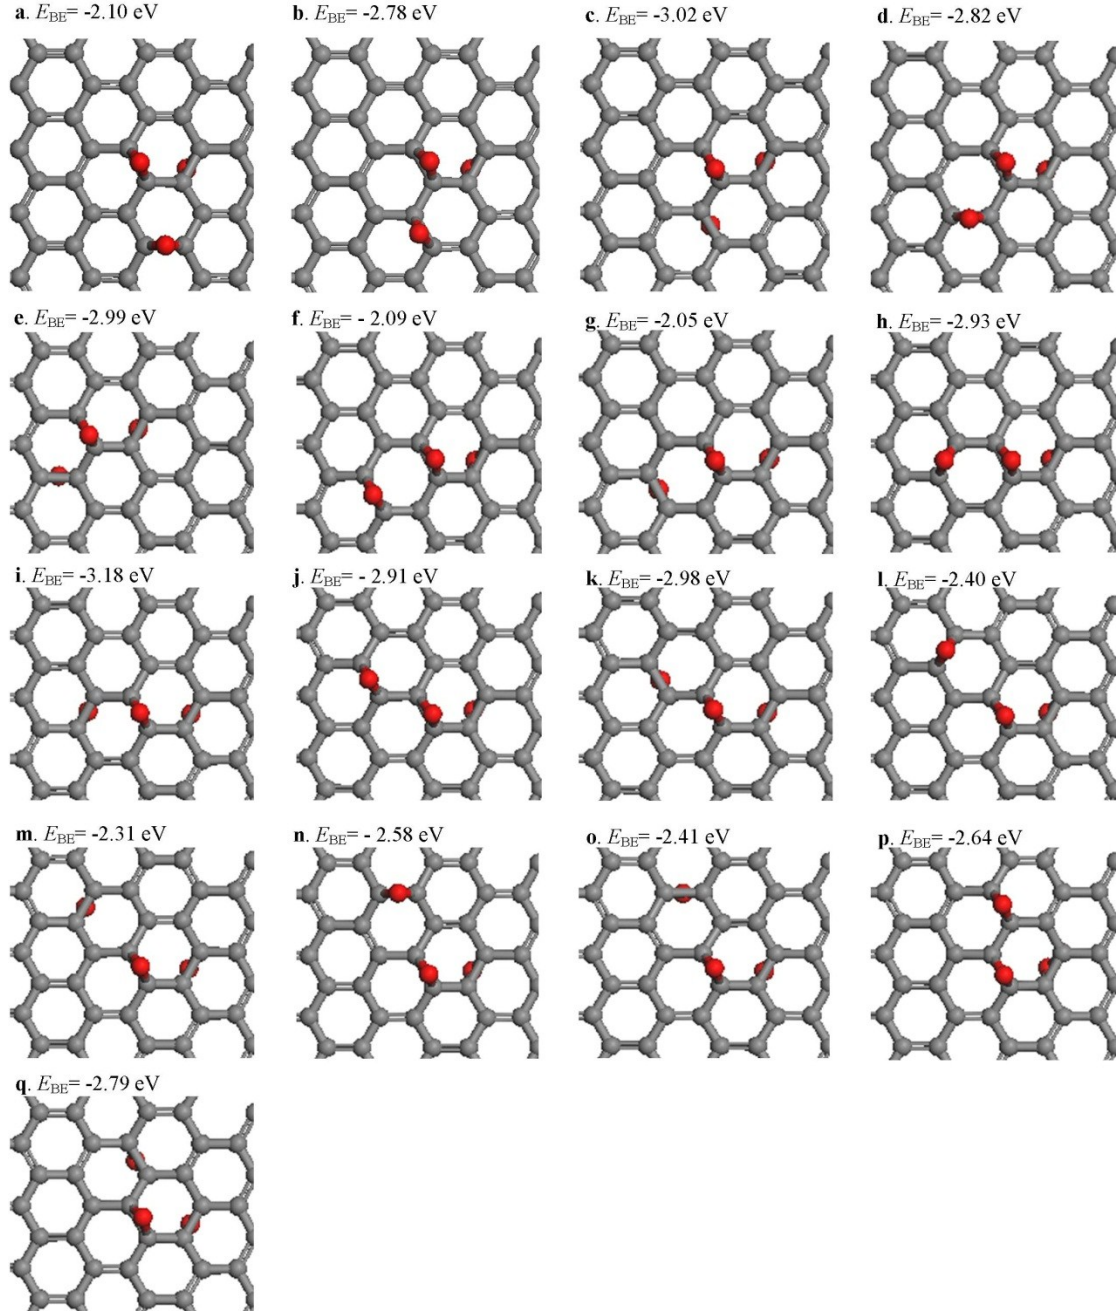

**Fig. S3.** Structure and binding energies ( $E_{BE}$ ) of oxidized graphene with three epoxy groups.

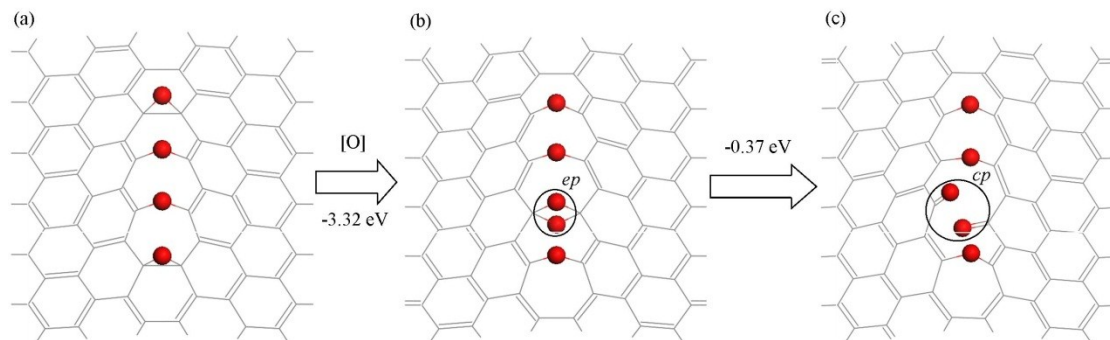

**Fig. S4.** Structure of oxidized graphene with (a) zigzag epoxy chain, (b) epoxy pair, ep and (c) carbonyl pair, cp.

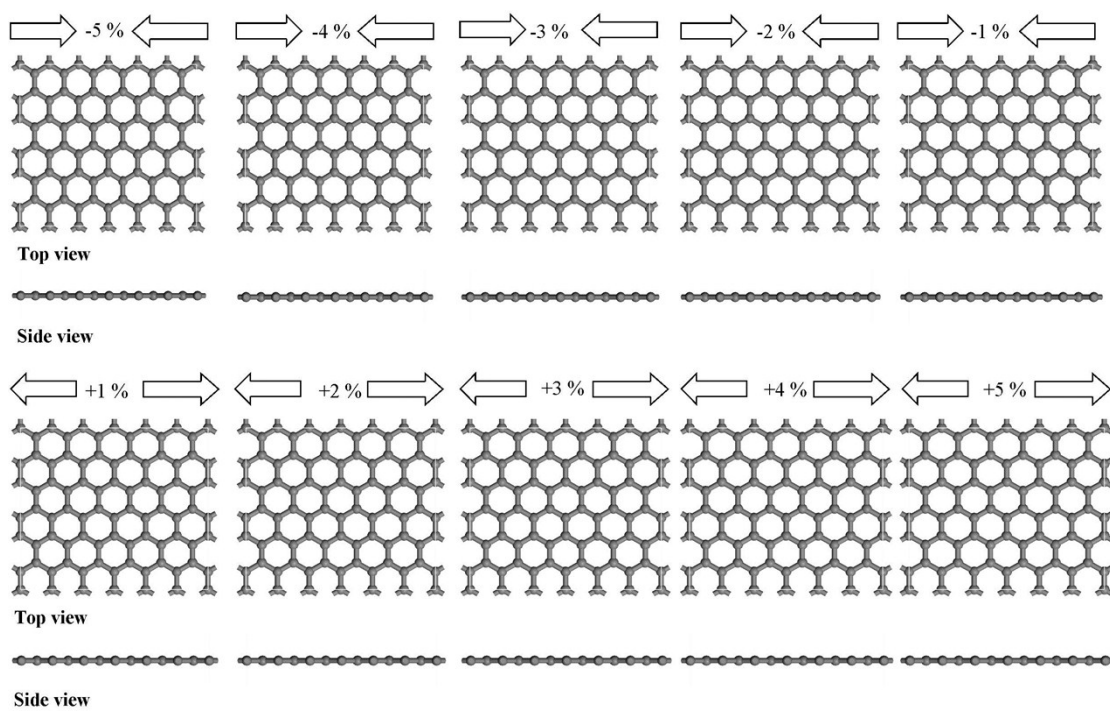

**Fig. S5.** Top view and side view of structure of graphene with strain (from -5% to +5%).

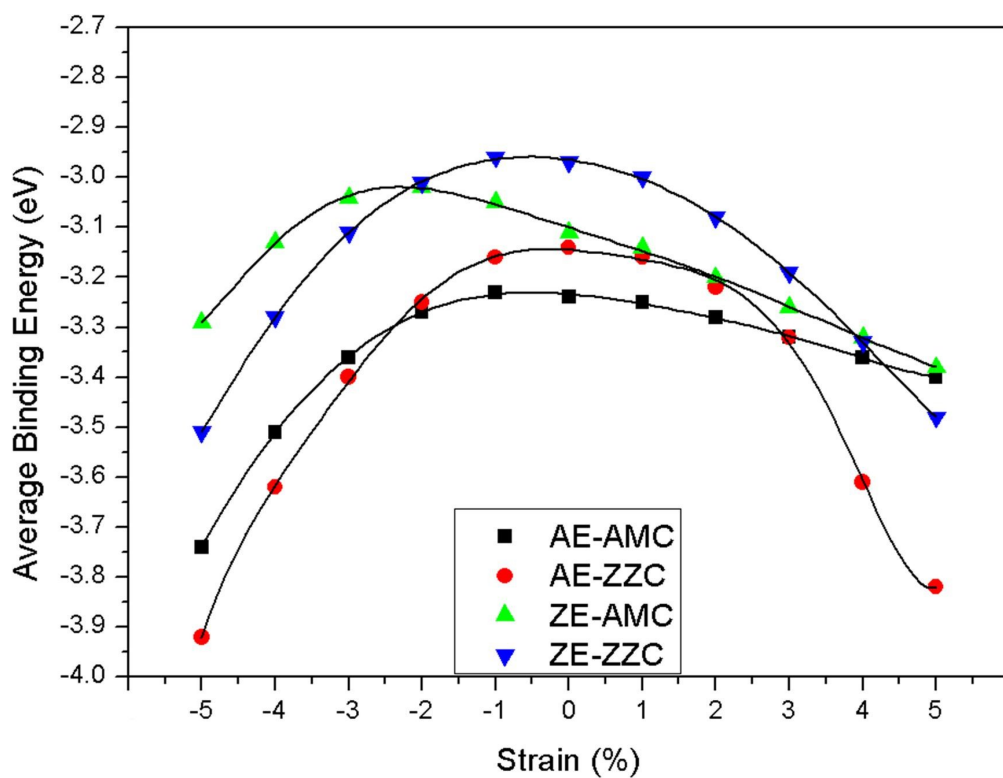

**Fig. S6.** Average binding energy of O atoms adsorption on graphene edge as a function of applied compressive and tensile strain. AE, ZE, AMC and ZZC indicate armchair edge zigzag edge, armchair epoxy chain and zigzag epoxy chain, respectively.
